# Supplementary material for: Weakly Supervised Deep Learning Predicts Immunotherapy Response in Solid Tumors Based on PD-L1 Expression
Source: PubMed Central journal article supplement (PMC10782919; doi:10.1158/2767-9764.crc-23-0287), 2024-01-11
Supplement: crc-23-0287-s01.pdf [file crc-23-0287-s01.pdf]

|                         | <b>N</b> | <b>ACCURACY</b> | <b>SENSITIVITY</b> | <b>SPECIFICITY</b> | <b>PPV</b> | <b>NPV</b> |
|-------------------------|----------|-----------------|--------------------|--------------------|------------|------------|
| <b>NSCLC-MSK</b>        | 233      | 0.75            | 0.71               | 0.85               | 0.91       | 0.57       |
| <b>PANCANCER-VHIO</b>   | 122      | 0.77            | 0.79               | 0.75               | 0.74       | 0.80       |
| <b>LUNG</b>             | 30       | 0.83            | 0.93               | 0.73               | 0.76       | 0.92       |
| <b>GASTROINTESTINAL</b> | 27       | 0.68            | 0.44               | 0.85               | 0.67       | 0.69       |
| <b>SKIN</b>             | 15       | 0.60            | 1.00               | 0.33               | 0.50       | 1.00       |
| <b>GYNECOLOGICAL</b>    | 10       | 0.78            | 0.67               | 0.83               | 0.67       | 0.83       |
| <b>HEAD AND NECK</b>    | 9        | 0.88            | 1.00               | 0.50               | 0.86       | 1.00       |
| <b>BREAST</b>           | 8        | 0.88            | 1.00               | 0.83               | 0.67       | 1.00       |
| <b>URINARY</b>          | 6        | 1.00            | 1.00               | 1.00               | 1.00       | 1.00       |
| <b>HEPATOBIILIARY</b>   | 5        | 0.75            | 0.50               | 1.00               | 1.00       | 0.67       |
| <b>SARCOMA</b>          | 3        | 0.67            | 0.50               | 1.00               | 1.00       | 0.50       |
| <b>OTHER</b>            | 9        | 0.71            | 1.00               | 0.60               | 0.50       | 1.00       |

**Table S1.** Model classification performance for the training (NSCLC-MSK) and test (pan-cancer-VHIO) cohorts: Accuracy, Sensitivity, Specificity, Positive Predictive Value (PPV) and Negative Predictive Value (NPV). For the Pan-cancer cohort, the performance for the different tumor types is also reported.
