# Supplementary material for: Weakly Supervised Deep Learning Predicts Immunotherapy Response in Solid Tumors Based on PD-L1 Expression
Source: PubMed Central journal article supplement (PMC10782919; doi:10.1158/2767-9764.crc-23-0287), 2024-01-11
Supplement: crc-23-0287-s03.pdf [file crc-23-0287-s03.pdf]

High PDL1 status (TPS $\geq$ 1)

A) PanCytokeratin IHC staining

B) PD-L1 IHC staining

C) Attention heatmaps

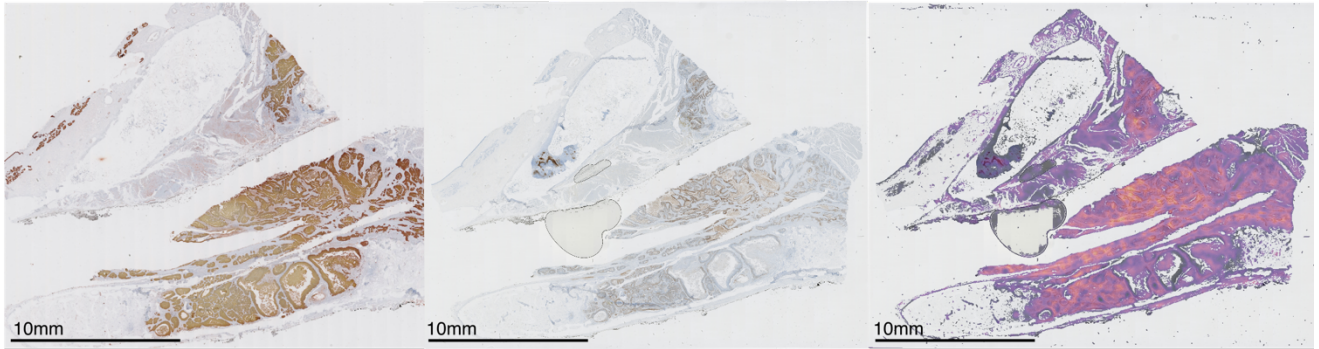

Low PDL1 status (TPS $<$ 1)

D) PanCytokeratin IHC staining

E) PD-L1 IHC staining

F) Attention heatmaps

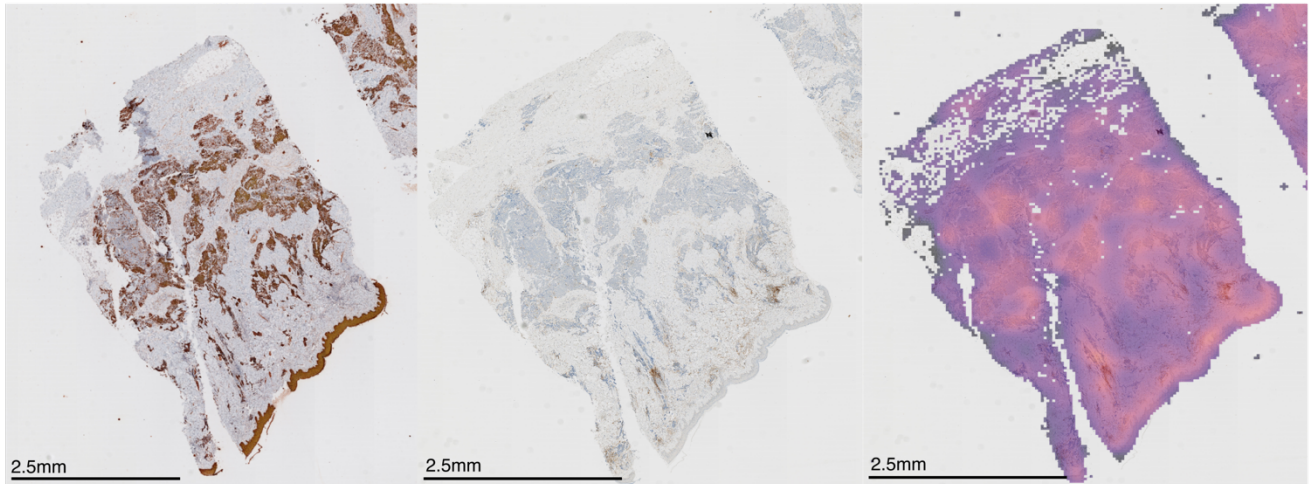

**Figure S2. Visualization of PanCytokeratin IHC staining, PD-L1 IHC staining and model attention heatmaps of a high (top) and low (bottom) PD-L1 score patients pan-cancer-VHIO cohort.** PanCytokeratin IHC stained images differentiate tumor tissue (A, D). PD-L1 IHC stained images highlight tumor cells with high PD-L1 expression (B, E). Attention heatmaps indicate that the model is considering tumor areas for evaluating TPS (C,F)
